# Supplementary material for: Oat β-glucan alleviates DSS-induced colitisviaregulating gut microbiota metabolism in mice
Source: Royal Society of Chemistry journal article supplement (doi:10.1039/d1fo01446c), 2021-01-01
Supplement: d1fo01446c1.pdf [file d1fo01446c1.pdf]

## Supplementary material

1

2

3 **Oat  $\beta$ -glucan alleviates DSS-induced colitis via regulating gut microbiota**  
4 **metabolism in mice**

5

6 Junying Bai<sup>1, #</sup>, Jiajia Zhao<sup>2, #</sup>, Waleed AL-Ansi<sup>1, 3</sup>, Jing Wang<sup>1</sup>, Lamei Xue<sup>1</sup>, Jinxin  
7 Liu<sup>1</sup>, Yu, Wang<sup>1</sup>, Mingcong Fan<sup>1</sup>, Haifeng Qian<sup>1</sup>, Yan Li<sup>1, \*</sup>, and Li Wang<sup>1, \*</sup>

8

9 <sup>1</sup> State Key Laboratory of Food Science and Technology, School of Food Science and  
10 Technology, Jiangnan University, Wuxi 214122, China.

11 <sup>2</sup> College of Cooking Science and Technology, Jiangsu College of Tourism,  
12 Yangzhou 225000, China.

13 <sup>3</sup> Department of Food Science and Technology, Faculty of Agriculture, Sana'a  
14 University, Sana'a, Yemen.

16 **Table S1. Criteria for scoring disease activity index (DAI)**

| <b>Score</b> | <b>Weight loss (%)</b> | <b>Stool consistency</b> | <b>Blood in stool</b> |
|--------------|------------------------|--------------------------|-----------------------|
| 0            | <1                     | normal                   | negative              |
| 1            | 1-5                    |                          |                       |
| 2            | 6-10                   | loose                    | visible blood stool   |
| 3            | 11-15                  |                          |                       |
| 4            | >15                    | diarrhea                 | gross bleeding        |

17

19 **Table S2. Detailed information for primer sequence**

| <b>Gene</b>   | <b>Sense sequence (5'→ 3')</b> | <b>Antisense sequence (5'→ 3')</b> |
|---------------|--------------------------------|------------------------------------|
| TNF- $\alpha$ | GGTGCCTATGTCTCAGCCTCTT         | GCCATAGAAGCTGATGAGAGGGAG           |
| IFN- $\gamma$ | TCAAGTGGCATAGATGTGGAAGAA       | TGGCTCTGCAGGATTTTCATG              |
| IL-6          | TACCACTTCACAAGTCGGAGGC         | CTGCAAGTGCATCATCGTTGTTC            |
| GAPDH         | ACATCATCCCTGCATCCACT           | GTCCTCAGTGTAGCCCAAG                |
| ZO-1          | CTTCTCTTGCTGGCCCTAAAC          | TGGCTTCACTTGAGGTTTCTG              |
| Occludin      | CACACTTGCTTGGGACAGAG           | TAGCCATAGCCTCCATAGCC               |
| Claudin-1     | GATGTGGATGGCTGTCATTG           | CCTGGCCAAATTCATACCTG               |
| Claudin-4     | TGCACCAACTGCGTGGAGGATGAG       | ACCACCAGCGGGTTGTAGAAGTC            |

C

Note: TNF- $\alpha$ , tumor necrosis factor- $\alpha$ ; IFN- $\gamma$ , interferon- $\gamma$ ; IL-6, interleukin-6; GAPDH, glyceraldehyde-3-phosphate dehydrogenase; ZO-1, zonula occludens-1.

22 **Table S3. The instrumental conditions for untargeted metabolomics analysis**

| <b>Instrument conditions</b> | <b>WATERS MALDI SYNAPT Q-TOF MS</b>                                                                                                                                                                                                                                                             |
|------------------------------|-------------------------------------------------------------------------------------------------------------------------------------------------------------------------------------------------------------------------------------------------------------------------------------------------|
| Spectrum Column              | WATERS BEH C18 column (2.1×150 mm, 1.7 μm)<br>Column temperature: 45 °C                                                                                                                                                                                                                         |
| Injection Volume             | 5 μL                                                                                                                                                                                                                                                                                            |
| Mass Parameters              | Ion Source<br><i>Capillary: 3.5 kV</i><br><i>Cone: 30 V</i><br><i>Source Block Temperature: 100 °C</i><br><i>Desolvation Temperature: 400 °C</i><br><i>Desolvation Gas Flow: 700 L/h</i><br><i>Cone Gas Flow: 50 L/h</i><br><i>Collision Energy: 6/20 V</i><br><i>Deterctor Voltage: 1800 V</i> |

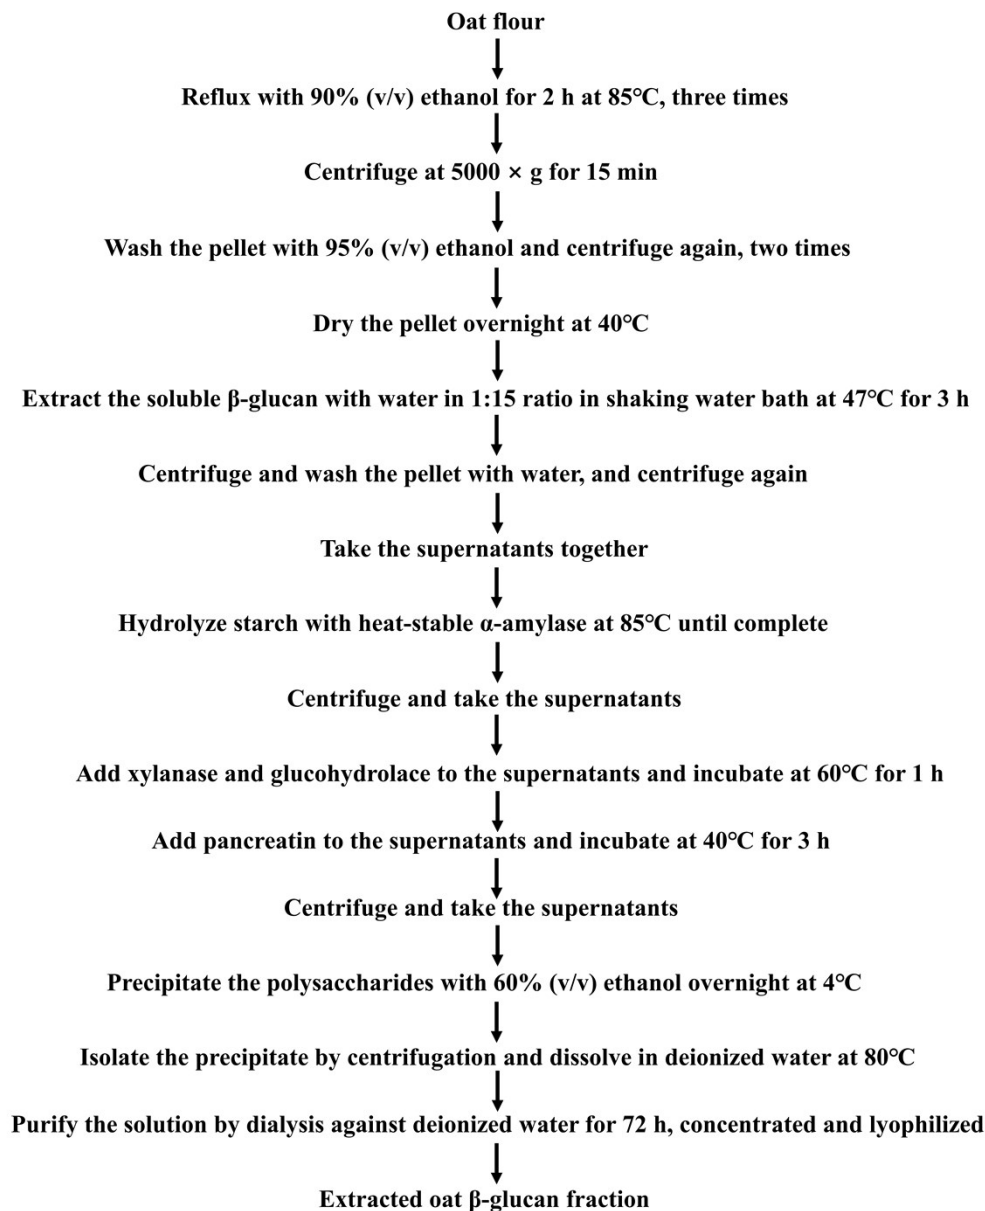

25

26 **Fig. S1.** Preparation workflow of oat  $\beta$ -glucan from oat bran was based on the most  
 27 common method of aqueous extraction in previous report with some modifications.  
 28 Xylanase and glucohydrolase were added to remove other polysaccharides. Pancreatin  
 29 including lipase, amylase, and trypsin was used to hydrolyze fat, starch, and protein in  
 30 oat bran powder.

31
